# Supplementary material
Source: PubMed Central journal article supplement (PMC3967962)
Supplement: NIHMS558949-supplement-10.pdf [file NIHMS558949-supplement-10.pdf]

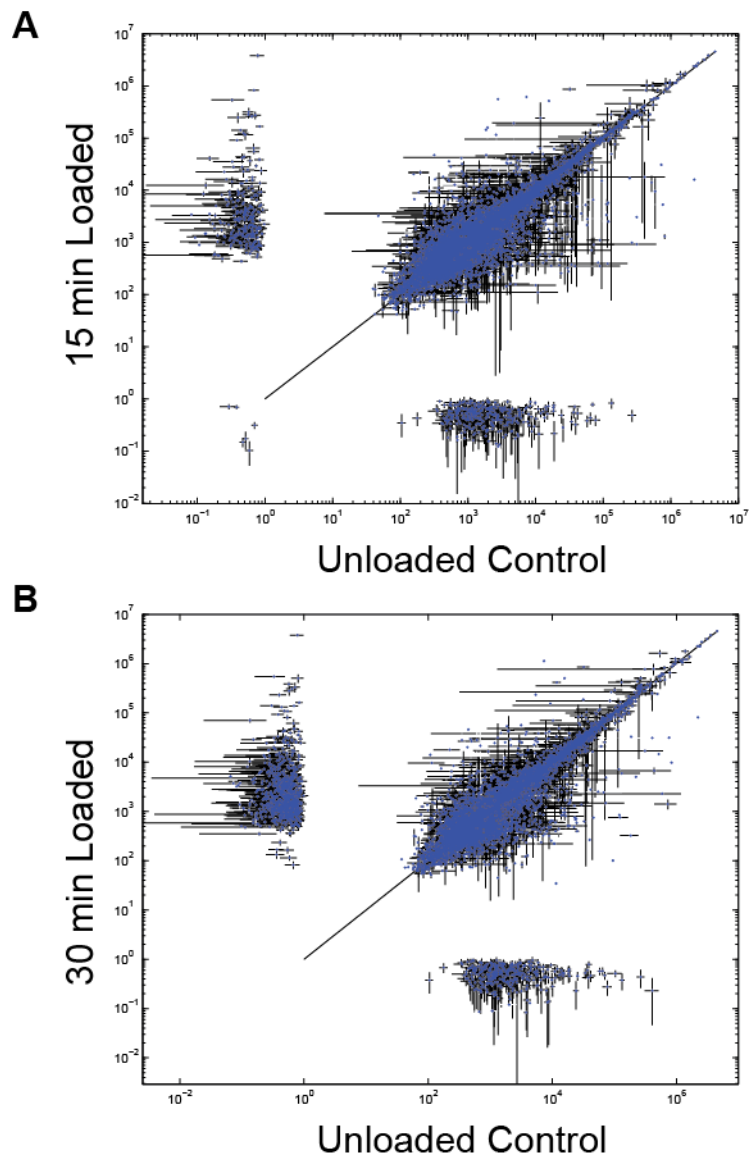

**Figure S2**

Scatter plots of untargeted metabolites. Comparing unloaded controls to both 15 minutes of loading (A) and 30 minutes of loading (B), we observe clusters of metabolites that are either induced or suppressed by mechanical loading.
