# Supplementary material
Source: PubMed Central journal article supplement (PMC3967962)
Supplement: NIHMS558949-supplement-11.pdf [file NIHMS558949-supplement-11.pdf]

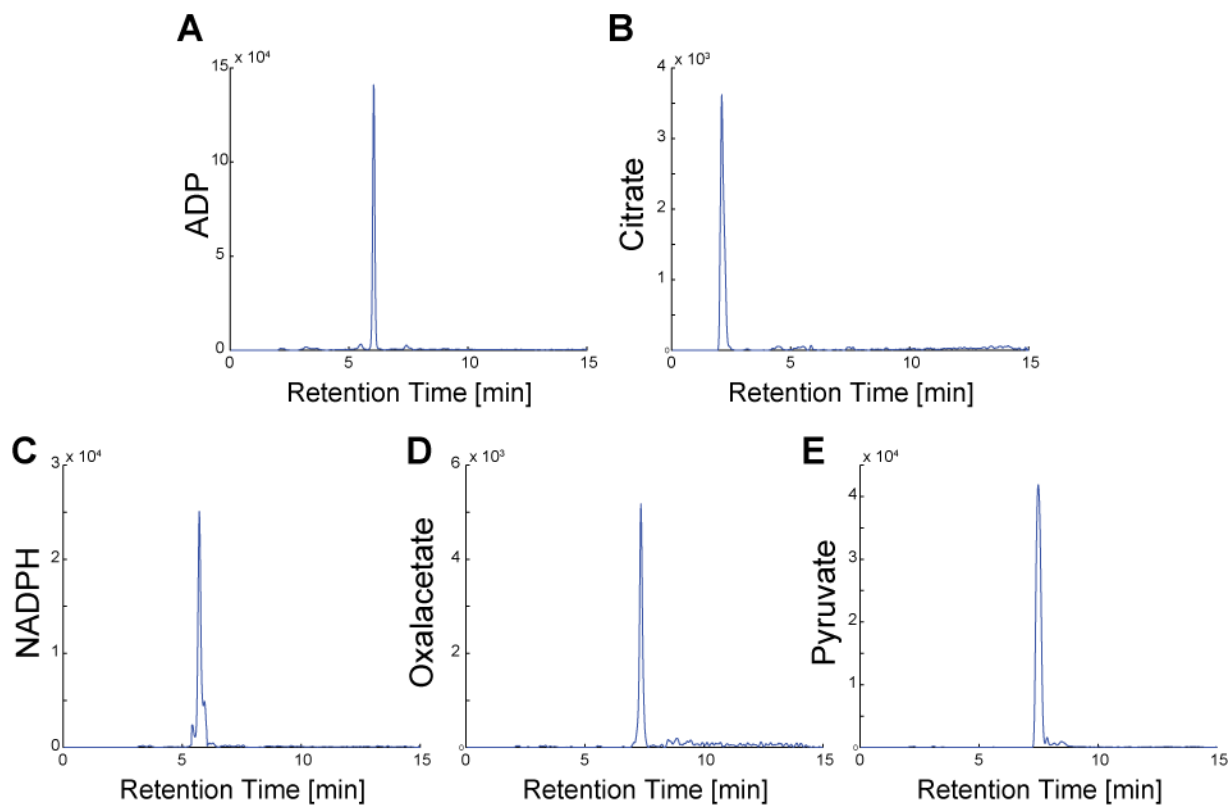

**Figure S3**

Representative chromatograms of targeted metabolites. Representative chromatograms are shown for the extracted ion intensity of targeted metabolites of median intensity. Intensity is summed over all ions and adducts. (A) ADP (B) Citrate (C) NADPH (D) Oxalacetate (E) Pyruvate.
