# Supplementary material
Source: PubMed Central journal article supplement (PMC3967962)

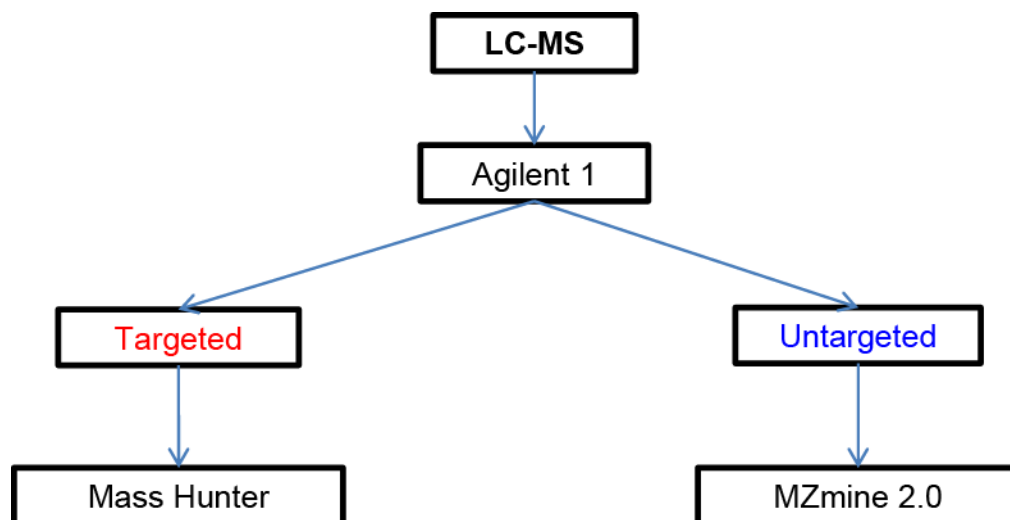

**Figure S1**

Analysis workflow for quantifying metabolite intensities following LC-MS analysis.

Supplement: NIHMS558949-supplement-09.pdf [file NIHMS558949-supplement-09.pdf]
